# Supplementary material
Source: MDPI journal article supplement (https://www.mdpi.com/2073-4441/12/11/2967)
Supplement: s1 [file s1]

**Table S1.** NEON Data Products Used in Study.

| <b>Data Product</b>                                               | <b>Used In</b>            | <b>Instrument</b>                                      | <b>NEON Product Code</b> |
|-------------------------------------------------------------------|---------------------------|--------------------------------------------------------|--------------------------|
| Isotopic composition of ecosystem boundary layer (TL 1-4)         | Keeling Plot & GMWL       | PICARRO L2130-i                                        | DP1.00037.001            |
| Water vapor concentration of ecosystem boundary layer (TL 1-4)    | Keeling Plot              | LI-840A                                                | DP1.00100.001            |
| Isotopic composition of planetary boundary layer (Tower Top)      | Keeling Plot, GMWL, & CGM | PICARRO L2130-i                                        | DP1.00037.001            |
| Water vapor concentration of planetary boundary layer (Tower Top) | Keeling Plot              | LI-840A                                                | DP1.00100.001            |
| Relative humidity                                                 | CGM & VPD                 | HMP155A (Tower Top)                                    | DP1.00098.001            |
| Soil Moisture                                                     | Predictive Model          | Sentek - EnviroSCAN TriSCAN                            | DP1.00094.001            |
| Air Temperature                                                   | VPD                       | Thermometrics Climate RTD 100 $\Omega$ Probe           | DP1.00002.001            |
| Latent Heat Flux                                                  | Total Evapotranspiration  | LI-7200/LI-840A/CSAT-3 3D Sonic Anemometer             | DP4.00137.001            |
| Shortwave and Longwave Radiation (Net Radiometer)                 | Penman-Monteith Model     | Hukseflux NR01 Net Radiometer                          | DP1.00023.001            |
| Soil Heat Flux                                                    | Penman-Monteith Model     | Hukseflux HFP01SC: Self-Calibrating Heat Flux Sensor   | DP1.00040.001            |
| 2D Wind Speed and Direction                                       | Penman-Monteith & FFP     | Gill - Wind Observer II; Extreme Weather Wind Observer | DP1.00001.001            |
| Precipitation                                                     | Sap Flow Analysis         | Belfort AEPG II 600M Weighing gauge (DFIR)             | DP1.00006.001            |
| Stable Isotope Concentrations in Precipitation                    | GMWL                      | N-Con Systems Company Wet Deposition Collector         | DP1.00038.001            |
| Woody Plant Vegetation Structure (DBH & Species)                  | Sap Flow Analysis         | Field Crew                                             | DP1.10098.001            |

**Table S2.** Sapwood Area to Basal Area.

| Tree # | DBH (cm) | Sapwood Radius (cm) | Basal Area (m <sup>2</sup> ) | Sapwood Area (m <sup>2</sup> ) |
|--------|----------|---------------------|------------------------------|--------------------------------|
| 1      | 23.5     | 6.400               | 0.043                        | 0.032                          |
| 2      | 25.5     | 7.600               | 0.051                        | 0.040                          |
| 3      | 30.5     | 4.200               | 0.073                        | 0.033                          |
| 4      | 36       | 10.600              | 0.102                        | 0.077                          |
| 5      | 40       | 6.600               | 0.126                        | 0.064                          |
| 6      | 54.5     | 12.100              | 0.233                        | 0.149                          |
| 7      | 36       | 5.100               | 0.102                        | 0.046                          |
| 8      | 29       | 7.500               | 0.066                        | 0.047                          |
| 9      | 31       | --                  | 0.075                        |                                |
| 10     | 31       | 6.500               | 0.075                        | 0.046                          |
| 11     | 21.5     | 4.300               | 0.036                        | 0.022                          |

Tree #9 was rotten and not cored on this date.

**Table S3.** Daily Keeling Plots.

| DOY | Keeling Plot   |    |          |               |                        |
|-----|----------------|----|----------|---------------|------------------------|
|     |                | N  | Slope    | $\delta_{ET}$ | R <sup>2</sup> P-Value |
| 131 | $\delta^{18}O$ | 32 | -747.52  | 33.46         | 0.34 <0.001            |
|     | $\delta^2H$    | 32 | -7838.76 | 407.63        | 0.37 <0.001            |
| 132 | $\delta^{18}O$ | 22 | -50.06   | -13.31        | 0.52 <0.001            |
|     | $\delta^2H$    | 22 | -609.83  | -78.49        | 0.66 <0.001            |
| 133 | $\delta^{18}O$ | 16 | 10.49    | -14.61        | 0.10 0.24              |
|     | $\delta^2H$    | 16 | -552.25  | -74.18        | 0.70 <0.001            |
| 134 | $\delta^{18}O$ | 30 | -35.49   | -10.75        | 0.21 0.001             |
|     | $\delta^2H$    | 30 | -615.90  | -62.52        | 0.89 <0.001            |
| 135 | $\delta^{18}O$ | 30 | -13.70   | -11.88        | 0.04 0.3               |
|     | $\delta^2H$    | 30 | -776.71  | -50.96        | 0.82 <0.001            |
| 136 | $\delta^{18}O$ | 29 | -69.80   | -8.05         | 0.61 <0.001            |
|     | $\delta^2H$    | 29 | -629.38  | -50.84        | 0.59 <0.001            |
| 137 | $\delta^{18}O$ | 28 | -19.93   | -10.25        | 0.00 0.8               |
|     | $\delta^2H$    | 28 | -427.45  | -62.31        | 0.27 0.005             |
| 138 | $\delta^{18}O$ | 28 | -176.00  | -3.81         | 0.29 0.003             |
|     | $\delta^2H$    | 28 | -792.40  | -46.30        | 0.44 0.001             |
| 139 | $\delta^{18}O$ |    |          |               |                        |
|     | $\delta^2H$    |    |          |               |                        |
| 140 | $\delta^{18}O$ |    |          |               |                        |
|     | $\delta^2H$    |    |          |               |                        |
| 141 | $\delta^{18}O$ |    |          |               |                        |
|     | $\delta^2H$    |    |          |               |                        |
| 142 | $\delta^{18}O$ |    |          |               |                        |
|     | $\delta^2H$    |    |          |               |                        |
| 143 | $\delta^{18}O$ | 21 | -236.37  | -1.07         | 0.71 <0.001            |
|     | $\delta^2H$    | 21 | -1853.90 | -3.37         | 0.77 <0.001            |
| 144 | $\delta^{18}O$ | 30 | -326.00  | 0.24          | 0.20 0.01              |
|     | $\delta^2H$    | 30 | -2277.56 | -1.84         | 0.19 0.02              |
| 145 | $\delta^{18}O$ | 6  | -91.11   | -6.56         | 0.08 0.58              |
|     | $\delta^2H$    | 6  | 785.78   | -103.37       | 0.15 0.46              |
| 146 | $\delta^{18}O$ |    |          |               |                        |
|     | $\delta^2H$    |    |          |               |                        |
| 147 | $\delta^{18}O$ |    |          |               |                        |
|     | $\delta^2H$    |    |          |               |                        |
| 148 | $\delta^{18}O$ |    |          |               |                        |
|     | $\delta^2H$    |    |          |               |                        |
| 149 | $\delta^{18}O$ |    |          |               |                        |

|     |                       |    |          |         |      |        |
|-----|-----------------------|----|----------|---------|------|--------|
|     | $\delta^2\text{H}$    |    |          |         |      |        |
| 150 | $\delta^{18}\text{O}$ |    |          |         |      |        |
|     | $\delta^2\text{H}$    |    |          |         |      |        |
| 151 | $\delta^{18}\text{O}$ | 25 | -23.36   | -10.21  | 0.03 | 0.41   |
|     | $\delta^2\text{H}$    | 25 | -611.25  | -58.20  | 0.73 | <0.001 |
| 152 | $\delta^{18}\text{O}$ |    |          |         |      |        |
|     | $\delta^2\text{H}$    |    |          |         |      |        |
| 153 | $\delta^{18}\text{O}$ |    |          |         |      |        |
|     | $\delta^2\text{H}$    |    |          |         |      |        |
| 154 | $\delta^{18}\text{O}$ |    |          |         |      |        |
|     | $\delta^2\text{H}$    |    |          |         |      |        |
| 155 | $\delta^{18}\text{O}$ |    |          |         |      |        |
|     | $\delta^2\text{H}$    |    |          |         |      |        |
| 156 | $\delta^{18}\text{O}$ | 25 | 62.47    | -14.55  | 0.04 | 0.32   |
|     | $\delta^2\text{H}$    | 25 | -907.04  | -58.35  | 0.23 | 0.01   |
| 157 | $\delta^{18}\text{O}$ | 22 | 67.22    | -18.39  | 0.07 | 0.23   |
|     | $\delta^2\text{H}$    | 22 | 396.78   | -125.99 | 0.03 | 0.47   |
| 158 | $\delta^{18}\text{O}$ | 25 | -336.03  | -2.38   | 0.20 | 0.03   |
|     | $\delta^2\text{H}$    | 25 | -2255.50 | -25.01  | 0.25 | 0.01   |
| 159 | $\delta^{18}\text{O}$ | 25 | 550.91   | -36.69  | 0.62 | <0.001 |
|     | $\delta^2\text{H}$    | 25 | 2917.59  | -222.64 | 0.54 | <0.001 |
| 160 | $\delta^{18}\text{O}$ | 21 | 367.71   | -29.36  | 0.68 | <0.001 |
|     | $\delta^2\text{H}$    | 21 | 1396.28  | -167.08 | 0.50 | <0.001 |
| 161 | $\delta^{18}\text{O}$ | 25 | -117.65  | -9.13   | 0.38 | 0.001  |
|     | $\delta^2\text{H}$    | 25 | -927.70  | -57.32  | 0.40 | <0.001 |
| 162 | $\delta^{18}\text{O}$ | 17 | -122.39  | -5.69   | 0.45 | 0.003  |
|     | $\delta^2\text{H}$    | 17 | -876.52  | -43.51  | 0.80 | <0.001 |
| 163 | $\delta^{18}\text{O}$ | 9  | -403.20  | 9.02    | 0.60 | 0.01   |
|     | $\delta^2\text{H}$    | 9  | -3645.57 | 98.49   | 0.60 | 0.01   |
| 164 | $\delta^{18}\text{O}$ | 8  | -30.42   | -9.91   | 0.05 | 0.59   |
|     | $\delta^2\text{H}$    | 8  | -305.24  | -79.77  | 0.36 | 0.12   |
| 165 | $\delta^{18}\text{O}$ | 21 | -105.09  | -5.85   | 0.17 | 0.06   |
|     | $\delta^2\text{H}$    | 21 | -1077.59 | -33.80  | 0.73 | <0.001 |
| 166 | $\delta^{18}\text{O}$ | 29 | -68.88   | -9.81   | 0.18 | 0.02   |
|     | $\delta^2\text{H}$    | 29 | 353.19   | -98.74  | 0.13 | 0.05   |
| 167 | $\delta^{18}\text{O}$ | 26 | -9.95    | -11.60  | 0.02 | 0.54   |
|     | $\delta^2\text{H}$    | 26 | -494.01  | -65.91  | 0.72 | <0.001 |
| 168 | $\delta^{18}\text{O}$ | 29 | -134.38  | -7.20   | 0.76 | <0.001 |
|     | $\delta^2\text{H}$    | 29 | -1052.28 | -47.77  | 0.86 | <0.001 |
| 169 | $\delta^{18}\text{O}$ | 26 | 9.30     | -12.29  | 0.01 | 0.68   |
|     | $\delta^2\text{H}$    | 26 | -1100.90 | -43.47  | 0.79 | <0.001 |
| 170 | $\delta^{18}\text{O}$ | 29 | -97.11   | -7.86   | 0.61 | <0.001 |
|     | $\delta^2\text{H}$    | 29 | -864.74  | -47.32  | 0.86 | <0.001 |
| 171 | $\delta^{18}\text{O}$ |    |          |         |      |        |
|     | $\delta^2\text{H}$    |    |          |         |      |        |
| 172 | $\delta^{18}\text{O}$ | 14 | -260.39  | -1.77   | 0.49 | 0.005  |
|     | $\delta^2\text{H}$    | 14 | -1726.72 | -18.29  | 0.42 | 0.01   |
| 173 | $\delta^{18}\text{O}$ | 28 | 83.43    | -12.94  | 0.03 | 0.39   |
|     | $\delta^2\text{H}$    | 28 | 132.21   | -79.87  | 0.00 | 0.86   |
| 174 | $\delta^{18}\text{O}$ | 25 | -156.48  | -6.49   | 0.57 | <0.001 |
|     | $\delta^2\text{H}$    | 25 | -1261.48 | -43.43  | 0.67 | <0.001 |
| 175 | $\delta^{18}\text{O}$ | 29 | -12.93   | -9.84   | 0.05 | 0.25   |
|     | $\delta^2\text{H}$    | 29 | -287.15  | -61.54  | 0.56 | <0.001 |
| 176 | $\delta^{18}\text{O}$ | 28 | -5.95    | -9.87   | 0.00 | 0.95   |
|     | $\delta^2\text{H}$    | 28 | -254.83  | -62.02  | 0.00 | 0.75   |
| 177 | $\delta^{18}\text{O}$ | 19 | -138.36  | -7.47   | 0.20 | 0.05   |
|     | $\delta^2\text{H}$    | 19 | -1290.47 | -43.08  | 0.40 | 0.003  |

|     |                       |    |          |         |      |        |
|-----|-----------------------|----|----------|---------|------|--------|
| 178 | $\delta^{18}\text{O}$ | 26 | -123.40  | -6.23   | 0.83 | <0.001 |
|     | $\delta^2\text{H}$    | 26 | -1238.07 | -31.40  | 0.90 | <0.001 |
| 179 | $\delta^{18}\text{O}$ |    |          |         |      |        |
|     | $\delta^2\text{H}$    |    |          |         |      |        |
| 180 | $\delta^{18}\text{O}$ |    |          |         |      |        |
|     | $\delta^2\text{H}$    |    |          |         |      |        |
| 181 | $\delta^{18}\text{O}$ | 28 | 53.82    | -12.60  | 0.09 | 0.12   |
|     | $\delta^2\text{H}$    | 28 | -488.25  | -53.63  | 0.44 | <0.001 |
| 182 | $\delta^{18}\text{O}$ | 29 | 5.11     | -10.78  | 0.00 | 0.76   |
|     | $\delta^2\text{H}$    | 29 | -952.03  | -40.64  | 0.84 | <0.001 |
| 183 | $\delta^{18}\text{O}$ | 28 | 93.35    | -13.59  | 0.03 | 0.36   |
|     | $\delta^2\text{H}$    | 28 | 697.32   | -95.62  | 0.02 | 0.44   |
| 184 | $\delta^{18}\text{O}$ | 28 | 448.51   | -28.90  | 0.64 | <0.001 |
|     | $\delta^2\text{H}$    | 28 | 1963.94  | -161.84 | 0.54 | <0.001 |
| 185 | $\delta^{18}\text{O}$ |    |          |         |      |        |
|     | $\delta^2\text{H}$    |    |          |         |      |        |
| 186 | $\delta^{18}\text{O}$ |    |          |         |      |        |
|     | $\delta^2\text{H}$    |    |          |         |      |        |
| 187 | $\delta^{18}\text{O}$ |    |          |         |      |        |
|     | $\delta^2\text{H}$    |    |          |         |      |        |
| 188 | $\delta^{18}\text{O}$ |    |          |         |      |        |
|     | $\delta^2\text{H}$    |    |          |         |      |        |
| 189 | $\delta^{18}\text{O}$ |    |          |         |      |        |
|     | $\delta^2\text{H}$    |    |          |         |      |        |
| 190 | $\delta^{18}\text{O}$ | 25 | -110.15  | -7.98   | 0.73 | <0.001 |
|     | $\delta^2\text{H}$    | 25 | -1486.18 | -32.69  | 0.91 | <0.001 |
| 191 | $\delta^{18}\text{O}$ | 20 | 180.80   | -14.95  | 0.63 | <0.001 |
|     | $\delta^2\text{H}$    | 20 | 188.99   | -73.51  | 0.01 | 0.64   |
| 192 | $\delta^{18}\text{O}$ | 26 | 170.06   | -16.84  | 0.43 | <0.001 |
|     | $\delta^2\text{H}$    | 26 | 45.86    | -78.27  | 0.00 | 0.92   |
| 193 | $\delta^{18}\text{O}$ | 25 | 120.23   | -19.27  | 0.05 | 0.27   |
|     | $\delta^2\text{H}$    | 25 | 377.29   | -118.81 | 0.03 | 0.44   |
| 194 | $\delta^{18}\text{O}$ | 25 | 166.49   | -20.58  | 0.26 | 0.009  |
|     | $\delta^2\text{H}$    | 25 | -6.28    | -102.01 | 0.00 | 0.96   |
| 195 | $\delta^{18}\text{O}$ | 27 | 223.42   | -22.75  | 0.02 | 0.54   |
|     | $\delta^2\text{H}$    | 27 | 1490.86  | -161.88 | 0.02 | 0.44   |
| 196 | $\delta^{18}\text{O}$ | 25 | 173.20   | -20.90  | 0.56 | <0.001 |
|     | $\delta^2\text{H}$    | 25 | 129.14   | -112.49 | 0.03 | 0.39   |
| 197 | $\delta^{18}\text{O}$ |    |          |         |      |        |
|     | $\delta^2\text{H}$    |    |          |         |      |        |
| 198 | $\delta^{18}\text{O}$ | 29 | 392.56   | -23.19  | 0.31 | 0.002  |
|     | $\delta^2\text{H}$    | 29 | 1649.41  | -126.19 | 0.15 | 0.04   |
| 199 | $\delta^{18}\text{O}$ | 28 | -348.93  | 2.22    | 0.74 | <0.001 |
|     | $\delta^2\text{H}$    | 28 | -2164.17 | 3.31    | 0.77 | <0.001 |
| 200 | $\delta^{18}\text{O}$ | 28 | -142.30  | -5.27   | 0.29 | 0.003  |
|     | $\delta^2\text{H}$    | 28 | -313.93  | -64.31  | 0.05 | 0.27   |
| 201 | $\delta^{18}\text{O}$ | 29 | -33.64   | -8.64   | 0.02 | 0.47   |
|     | $\delta^2\text{H}$    | 29 | 213.92   | -77.79  | 0.05 | 0.24   |
| 202 | $\delta^{18}\text{O}$ | 28 | -118.81  | -4.32   | 0.09 | 0.11   |
|     | $\delta^2\text{H}$    | 28 | -310.36  | -53.00  | 0.11 | 0.09   |
| 203 | $\delta^{18}\text{O}$ | 27 | 167.67   | -15.14  | 0.16 | 0.04   |
|     | $\delta^2\text{H}$    | 27 | 66.77    | -69.03  | 0.00 | 0.91   |
| 204 | $\delta^{18}\text{O}$ | 29 | 137.95   | -20.98  | 0.13 | 0.05   |
|     | $\delta^2\text{H}$    | 29 | 449.88   | -125.84 | 0.09 | 0.1    |
| 205 | $\delta^{18}\text{O}$ | 29 | -58.30   | -10.41  | 0.04 | 0.3    |
|     | $\delta^2\text{H}$    | 29 | -756.30  | -63.23  | 0.51 | <0.001 |
| 206 | $\delta^{18}\text{O}$ | 26 | 76.09    | -15.86  | 0.24 | 0.01   |

|     |                       |    |          |        |      |        |
|-----|-----------------------|----|----------|--------|------|--------|
|     | $\delta^2\text{H}$    | 26 | -371.49  | -71.02 | 0.51 | <0.001 |
| 207 | $\delta^{18}\text{O}$ | 29 | 16.69    | -12.80 | 0.01 | 0.57   |
|     | $\delta^2\text{H}$    | 29 | -638.76  | -61.87 | 0.72 | <0.001 |
| 208 | $\delta^{18}\text{O}$ | 29 | 17.79    | -11.50 | 0.02 | 0.47   |
|     | $\delta^2\text{H}$    | 29 | -527.42  | -55.45 | 0.77 | <0.001 |
| 209 | $\delta^{18}\text{O}$ | 28 | 67.69    | -12.84 | 0.20 | 0.02   |
|     | $\delta^2\text{H}$    | 28 | -330.78  | -64.86 | 0.39 | <0.001 |
| 210 | $\delta^{18}\text{O}$ | 26 | -335.59  | 2.62   | 0.84 | <0.001 |
|     | $\delta^2\text{H}$    | 26 | -1179.73 | -26.63 | 0.58 | <0.001 |
| 211 | $\delta^{18}\text{O}$ | 22 | -25.78   | -8.35  | 0.03 | 0.47   |
|     | $\delta^2\text{H}$    | 22 | -793.47  | -44.51 | 0.27 | 0.01   |
| 212 | $\delta^{18}\text{O}$ | 9  | 180.33   | -16.00 | 0.07 | 0.5    |
|     | $\delta^2\text{H}$    | 9  | -586.41  | -50.15 | 0.03 | 0.65   |
| 213 | $\delta^{18}\text{O}$ |    |          |        |      |        |
|     | $\delta^2\text{H}$    |    |          |        |      |        |
| 214 | $\delta^{18}\text{O}$ | 19 | 21.94    | -10.13 | 0.01 | 0.73   |
|     | $\delta^2\text{H}$    | 19 | -946.20  | -36.42 | 0.59 | <0.001 |
| 215 | $\delta^{18}\text{O}$ | 24 | -932.58  | 20.06  | 0.58 | <0.001 |
|     | $\delta^2\text{H}$    | 24 | -3407.79 | 39.82  | 0.52 | <0.001 |
| 216 | $\delta^{18}\text{O}$ | 27 | -123.32  | -6.38  | 0.16 | 0.04   |
|     | $\delta^2\text{H}$    | 27 | -1085.13 | -38.14 | 0.30 | 0.003  |
| 217 | $\delta^{18}\text{O}$ | 25 | 65.14    | -12.12 | 0.05 | 0.26   |
|     | $\delta^2\text{H}$    | 25 | -721.36  | -48.46 | 0.42 | <0.001 |
| 218 | $\delta^{18}\text{O}$ | 24 | 83.10    | -11.95 | 0.11 | 0.11   |
|     | $\delta^2\text{H}$    | 24 | -1066.55 | -35.26 | 0.68 | <0.001 |
| 219 | $\delta^{18}\text{O}$ | 27 | 147.41   | -14.41 | 0.16 | 0.04   |
|     | $\delta^2\text{H}$    | 27 | -233.93  | -62.42 | 0.11 | 0.1    |
| 220 | $\delta^{18}\text{O}$ | 28 | -21.24   | -8.64  | 0.02 | 0.51   |
|     | $\delta^2\text{H}$    | 28 | -472.27  | -54.14 | 0.61 | <0.001 |
| 221 | $\delta^{18}\text{O}$ | 25 | 96.01    | -12.43 | 0.09 | 0.14   |
|     | $\delta^2\text{H}$    | 25 | -754.63  | -44.07 | 0.69 | <0.001 |
| 222 | $\delta^{18}\text{O}$ | 26 | 290.66   | -20.15 | 0.32 | 0.003  |
|     | $\delta^2\text{H}$    | 26 | 352.81   | -85.08 | 0.15 | 0.05   |
| 223 | $\delta^{18}\text{O}$ | 26 | 149.94   | -15.09 | 0.13 | 0.08   |
|     | $\delta^2\text{H}$    | 26 | -545.97  | -53.52 | 0.41 | <0.001 |
| 224 | $\delta^{18}\text{O}$ | 26 | 339.63   | -22.65 | 0.78 | <0.001 |
|     | $\delta^2\text{H}$    | 26 | 399.02   | -93.38 | 0.47 | <0.001 |
| 225 | $\delta^{18}\text{O}$ | 28 | 160.30   | -16.69 | 0.29 | 0.003  |
|     | $\delta^2\text{H}$    | 28 | -428.07  | -68.02 | 0.29 | 0.003  |
| 226 | $\delta^{18}\text{O}$ | 22 | -92.66   | -9.17  | 0.05 | 0.3    |
|     | $\delta^2\text{H}$    | 22 | -1130.41 | -49.04 | 0.27 | 0.01   |
| 227 | $\delta^{18}\text{O}$ | 18 | 61.00    | -12.51 | 0.09 | 0.23   |
|     | $\delta^2\text{H}$    | 18 | -546.36  | -59.30 | 0.43 | 0.003  |
| 228 | $\delta^{18}\text{O}$ | 28 | 104.87   | -14.04 | 0.33 | 0.001  |
|     | $\delta^2\text{H}$    | 28 | -644.52  | -52.87 | 0.71 | <0.001 |
| 229 | $\delta^{18}\text{O}$ | 19 | -112.47  | -6.87  | 0.63 | <0.001 |
|     | $\delta^2\text{H}$    | 19 | -622.51  | -53.78 | 0.77 | <0.001 |
| 230 | $\delta^{18}\text{O}$ | 21 | -447.90  | 5.51   | 0.31 | 0.001  |
|     | $\delta^2\text{H}$    | 21 | -3206.88 | 39.41  | 0.40 | <0.001 |
| 231 | $\delta^{18}\text{O}$ | 13 | -274.97  | -0.84  | 0.14 | 0.2    |
|     | $\delta^2\text{H}$    | 13 | -1837.26 | -10.95 | 0.16 | 0.18   |
| 232 | $\delta^{18}\text{O}$ | 11 | 136.24   | -16.37 | 0.20 | 0.17   |
|     | $\delta^2\text{H}$    | 11 | 134.67   | -84.84 | 0.01 | 0.72   |
| 233 | $\delta^{18}\text{O}$ | 16 | 76.63    | -12.09 | 0.03 | 0.52   |
|     | $\delta^2\text{H}$    | 16 | 64.43    | -74.23 | 0.00 | 0.88   |
| 234 | $\delta^{18}\text{O}$ | 28 | 100.52   | -13.82 | 0.15 | 0.04   |
|     | $\delta^2\text{H}$    | 28 | -675.86  | -45.09 | 0.66 | <0.001 |

|     |                       |    |          |         |      |        |
|-----|-----------------------|----|----------|---------|------|--------|
| 235 | $\delta^{18}\text{O}$ | 27 | 72.44    | -12.77  | 0.24 | 0.001  |
|     | $\delta^2\text{H}$    | 27 | 334.28   | -83.55  | 0.22 | 0.01   |
| 236 | $\delta^{18}\text{O}$ |    |          |         |      |        |
|     | $\delta^2\text{H}$    |    |          |         |      |        |
| 237 | $\delta^{18}\text{O}$ | 27 | 82.86    | -16.82  | 0.23 | 0.01   |
|     | $\delta^2\text{H}$    | 27 | 29.96    | -102.96 | 0.00 | 0.88   |
| 238 | $\delta^{18}\text{O}$ | 28 | -316.02  | -1.46   | 0.40 | <0.001 |
|     | $\delta^2\text{H}$    | 28 | -2293.86 | -10.92  | 0.44 | <0.001 |
| 239 | $\delta^{18}\text{O}$ | 28 | 146.58   | -18.62  | 0.06 | 0.22   |
|     | $\delta^2\text{H}$    | 28 | 730.79   | -123.11 | 0.04 | 0.29   |
| 240 | $\delta^{18}\text{O}$ |    |          |         |      |        |
|     | $\delta^2\text{H}$    |    |          |         |      |        |
| 241 | $\delta^{18}\text{O}$ | 31 | -72.80   | -8.27   | 0.51 | <0.001 |
|     | $\delta^2\text{H}$    | 31 | -1320.62 | -36.73  | 0.70 | <0.001 |
| 242 | $\delta^{18}\text{O}$ |    |          |         |      |        |
|     | $\delta^2\text{H}$    |    |          |         |      |        |
| 243 | $\delta^{18}\text{O}$ | 29 | -118.52  | -8.16   | 0.71 | <0.001 |
|     | $\delta^2\text{H}$    | 29 | -925.22  | -56.16  | 0.27 | 0.004  |
| 244 | $\delta^{18}\text{O}$ | 29 | 27.06    | -14.16  | 0.01 | 0.59   |
|     | $\delta^2\text{H}$    | 29 | -232.15  | -87.63  | 0.04 | 0.29   |
| 245 | $\delta^{18}\text{O}$ | 27 | -43.47   | -8.73   | 0.10 | 0.11   |
|     | $\delta^2\text{H}$    | 27 | -1099.92 | -40.36  | 0.71 | <0.001 |
| 246 | $\delta^{18}\text{O}$ | 28 | 14.42    | -9.79   | 0.03 | 0.37   |
|     | $\delta^2\text{H}$    | 28 | -989.84  | -35.98  | 0.81 | <0.001 |
| 247 | $\delta^{18}\text{O}$ | 22 | 70.97    | -12.70  | 0.09 | 0.17   |
|     | $\delta^2\text{H}$    | 22 | -636.30  | -52.50  | 0.61 | <0.001 |
| 248 | $\delta^{18}\text{O}$ |    |          |         |      |        |
|     | $\delta^2\text{H}$    |    |          |         |      |        |
| 249 | $\delta^{18}\text{O}$ | 28 | 36.16    | -10.43  | 0.18 | 0.02   |
|     | $\delta^2\text{H}$    | 28 | -692.49  | -44.28  | 0.82 | <0.001 |
| 250 | $\delta^{18}\text{O}$ | 23 | 67.41    | -11.73  | 0.33 | 0.004  |
|     | $\delta^2\text{H}$    | 23 | -378.59  | -57.25  | 0.20 | 0.03   |
| 251 | $\delta^{18}\text{O}$ | 29 | 19.90    | -11.03  | 0.01 | 0.53   |
|     | $\delta^2\text{H}$    | 29 | -467.24  | -55.62  | 0.46 | <0.001 |
| 252 | $\delta^{18}\text{O}$ | 27 | 58.38    | -12.89  | 0.21 | 0.02   |
|     | $\delta^2\text{H}$    | 27 | -414.68  | -61.28  | 0.66 | <0.001 |
| 253 | $\delta^{18}\text{O}$ | 26 | 30.99    | -11.82  | 0.04 | 0.35   |
|     | $\delta^2\text{H}$    | 26 | -801.58  | -47.67  | 0.55 | <0.001 |
| 254 | $\delta^{18}\text{O}$ | 16 | 14.35    | -11.76  | 0.00 | 0.82   |
|     | $\delta^2\text{H}$    | 16 | -800.81  | -49.13  | 0.30 | 0.03   |
| 255 | $\delta^{18}\text{O}$ | 9  | 7.84     | -11.42  | 0.00 | 0.94   |
|     | $\delta^2\text{H}$    | 9  | -874.09  | -45.67  | 0.23 | 0.19   |
| 256 | $\delta^{18}\text{O}$ | 6  | -318.82  | 1.68    | 0.21 | 0.37   |
|     | $\delta^2\text{H}$    | 6  | -731.75  | -46.83  | 0.05 | 0.66   |
| 257 | $\delta^{18}\text{O}$ | 24 | 24.43    | -11.33  | 0.06 | 0.26   |
|     | $\delta^2\text{H}$    | 24 | -959.28  | -36.22  | 0.83 | <0.001 |
| 258 | $\delta^{18}\text{O}$ |    |          |         |      |        |
|     | $\delta^2\text{H}$    |    |          |         |      |        |
| 259 | $\delta^{18}\text{O}$ |    |          |         |      |        |
|     | $\delta^2\text{H}$    |    |          |         |      |        |
| 260 | $\delta^{18}\text{O}$ |    |          |         |      |        |
|     | $\delta^2\text{H}$    |    |          |         |      |        |
| 261 | $\delta^{18}\text{O}$ |    |          |         |      |        |
|     | $\delta^2\text{H}$    |    |          |         |      |        |
| 262 | $\delta^{18}\text{O}$ | 27 | 367.94   | -29.64  | 0.80 | <0.001 |
|     | $\delta^2\text{H}$    | 27 | 1713.00  | -183.05 | 0.71 | <0.001 |
| 263 | $\delta^{18}\text{O}$ | 28 | -648.44  | 9.15    | 0.84 | <0.001 |

|     |                       |    |          |         |      |        |
|-----|-----------------------|----|----------|---------|------|--------|
|     | $\delta^2\text{H}$    | 28 | -5068.05 | 75.51   | 0.84 | <0.001 |
| 264 | $\delta^{18}\text{O}$ |    |          |         |      |        |
|     | $\delta^2\text{H}$    |    |          |         |      |        |
| 265 | $\delta^{18}\text{O}$ |    |          |         |      |        |
|     | $\delta^2\text{H}$    |    |          |         |      |        |
| 266 | $\delta^{18}\text{O}$ | 17 | -368.38  | 3.03    | 0.44 | 0.005  |
|     | $\delta^2\text{H}$    | 17 | 2256.54  | -138.43 | 0.59 | <0.001 |
| 267 | $\delta^{18}\text{O}$ | 25 | -70.53   | -7.82   | 0.25 | 0.01   |
|     | $\delta^2\text{H}$    | 25 | -693.16  | -48.13  | 0.31 | 0.004  |
| 268 | $\delta^{18}\text{O}$ | 29 | -65.49   | -8.03   | 0.40 | <0.001 |
|     | $\delta^2\text{H}$    | 29 | -598.62  | -50.05  | 0.77 | <0.001 |
| 269 | $\delta^{18}\text{O}$ | 28 | -53.79   | -8.00   | 0.13 | 0.06   |
|     | $\delta^2\text{H}$    | 28 | -711.34  | -41.70  | 0.66 | <0.001 |
| 270 | $\delta^{18}\text{O}$ | 27 | -9.84    | -9.97   | 0.02 | 0.51   |
|     | $\delta^2\text{H}$    | 27 | -56.08   | -65.90  | 0.02 | 0.44   |
| 271 | $\delta^{18}\text{O}$ | 29 | -188.51  | -3.74   | 0.37 | <0.001 |
|     | $\delta^2\text{H}$    | 29 | -854.94  | -41.76  | 0.28 | 0.003  |
| 272 | $\delta^{18}\text{O}$ | 28 | -33.19   | -8.92   | 0.14 | 0.05   |
|     | $\delta^2\text{H}$    | 28 | -136.06  | -65.48  | 0.12 | 0.08   |
| 273 | $\delta^{18}\text{O}$ | 25 | 47.22    | -11.75  | 0.08 | 0.16   |
|     | $\delta^2\text{H}$    | 25 | 441.76   | -86.82  | 0.26 | 0.009  |
| 274 | $\delta^{18}\text{O}$ | 22 | 187.55   | -16.76  | 0.07 | 0.25   |
|     | $\delta^2\text{H}$    | 22 | 44.11    | -74.40  | 0.00 | 0.97   |
| 275 | $\delta^{18}\text{O}$ | 28 | -175.58  | -4.10   | 0.26 | 0.006  |
|     | $\delta^2\text{H}$    | 28 | -938.74  | -41.19  | 0.43 | <0.001 |
| 276 | $\delta^{18}\text{O}$ | 28 | 85.08    | -14.03  | 0.14 | 0.05   |
|     | $\delta^2\text{H}$    | 28 | -401.61  | -59.48  | 0.23 | 0.01   |
| 277 | $\delta^{18}\text{O}$ | 23 | -129.06  | -8.23   | 0.16 | 0.06   |
|     | $\delta^2\text{H}$    | 23 | -1024.87 | -52.79  | 0.21 | 0.03   |
| 278 | $\delta^{18}\text{O}$ | 29 | -87.82   | -7.95   | 0.07 | 0.16   |
|     | $\delta^2\text{H}$    | 29 | -867.54  | -47.38  | 0.41 | <0.001 |
| 279 | $\delta^{18}\text{O}$ | 29 | 141.88   | -16.15  | 0.05 | 0.26   |
|     | $\delta^2\text{H}$    | 29 | 888.00   | -113.03 | 0.06 | 0.2    |
| 280 | $\delta^{18}\text{O}$ | 22 | 31.20    | -18.61  | 0.12 | 0.12   |
|     | $\delta^2\text{H}$    | 22 | 361.58   | -140.60 | 0.39 | 0.002  |
| 281 | $\delta^{18}\text{O}$ | 27 | 42.99    | -16.74  | 0.39 | <0.001 |
|     | $\delta^2\text{H}$    | 27 | -172.68  | -85.89  | 0.45 | <0.001 |
| 282 | $\delta^{18}\text{O}$ | 26 | -13.44   | -12.55  | 0.02 | 0.54   |
|     | $\delta^2\text{H}$    | 26 | -424.84  | -71.47  | 0.51 | <0.001 |
| 283 | $\delta^{18}\text{O}$ | 19 | 759.80   | -37.76  | 0.06 | 0.33   |
|     | $\delta^2\text{H}$    | 19 | 5972.40  | -287.30 | 0.06 | 0.3    |
| 284 | $\delta^{18}\text{O}$ | 28 | -87.38   | -7.99   | 0.80 | <0.001 |
|     | $\delta^2\text{H}$    | 28 | -546.74  | -65.51  | 0.73 | <0.001 |
| 285 | $\delta^{18}\text{O}$ | 18 | -9.73    | -13.81  | 0.11 | 0.18   |
|     | $\delta^2\text{H}$    | 18 | -160.91  | -96.03  | 0.33 | 0.01   |
| 286 | $\delta^{18}\text{O}$ | 14 | -49.90   | -7.28   | 0.15 | 0.17   |
|     | $\delta^2\text{H}$    | 14 | -231.48  | -62.14  | 0.09 | 0.29   |
| 287 | $\delta^{18}\text{O}$ | 12 | 85.17    | -16.67  | 0.28 | 0.08   |
|     | $\delta^2\text{H}$    | 12 | 509.24   | -113.94 | 0.32 | 0.05   |
| 288 | $\delta^{18}\text{O}$ | 19 | 2532.48  | -101.79 | 0.45 | 0.002  |
|     | $\delta^2\text{H}$    | 19 | 17017.94 | -689.52 | 0.44 | 0.002  |
| 289 | $\delta^{18}\text{O}$ | 28 | -178.15  | 4.36    | 0.16 | 0.04   |
|     | $\delta^2\text{H}$    | 28 | -602.80  | -60.88  | 0.12 | 0.08   |
| 290 | $\delta^{18}\text{O}$ | 29 | 39.82    | -17.30  | 0.33 | 0.001  |
|     | $\delta^2\text{H}$    | 29 | -114.91  | -101.67 | 0.26 | 0.005  |
| 291 | $\delta^{18}\text{O}$ | 28 | 38.02    | -17.45  | 0.24 | 0.009  |
|     | $\delta^2\text{H}$    | 28 | -209.97  | -85.99  | 0.45 | <0.001 |

|     |                       |    |         |         |      |        |
|-----|-----------------------|----|---------|---------|------|--------|
| 292 | $\delta^{18}\text{O}$ | 26 | 83.44   | -18.54  | 0.23 | 0.01   |
|     | $\delta^2\text{H}$    | 26 | 409.49  | -124.98 | 0.32 | 0.002  |
| 293 | $\delta^{18}\text{O}$ | 28 | 9.79    | -13.79  | 0.05 | 0.26   |
|     | $\delta^2\text{H}$    | 28 | -286.65 | -80.68  | 0.51 | <0.001 |
| 294 | $\delta^{18}\text{O}$ | 27 | 10.52   | -13.87  | 0.06 | 0.23   |
|     | $\delta^2\text{H}$    | 27 | -331.99 | -76.86  | 0.72 | <0.001 |

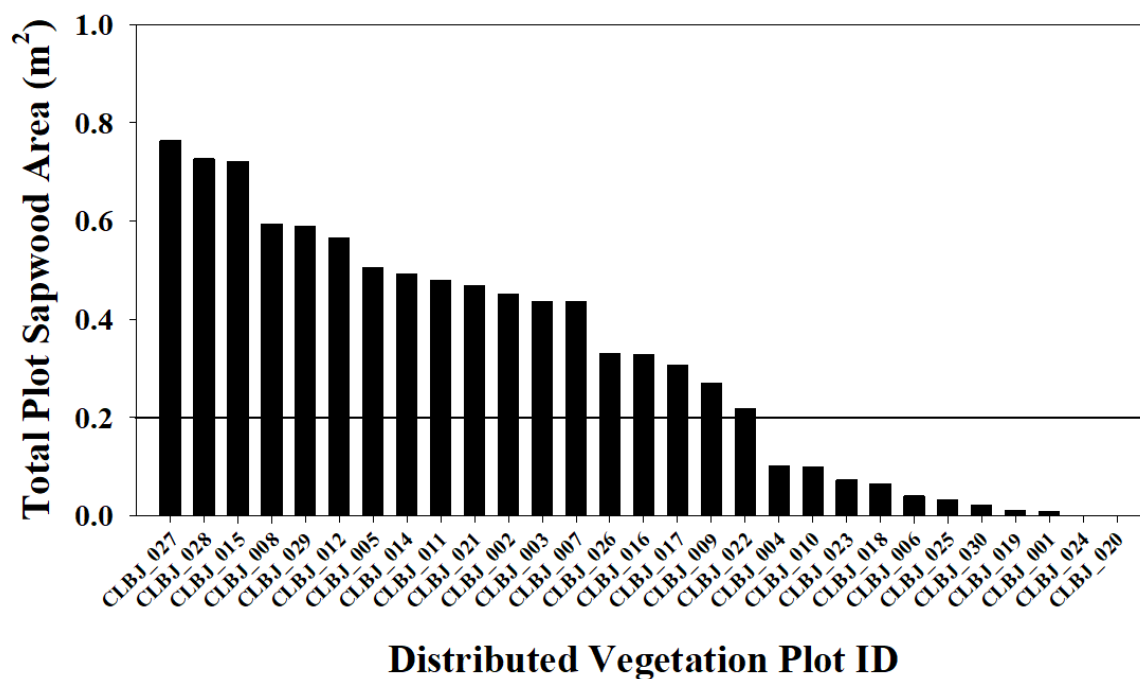

**Figure S1.** Distributed Plots Sapwood Area.
